# Supplementary material for: Lymphatic vessels interact dynamically with the hair follicle stem cell niche during skin regeneration in vivo
Source: PubMed Central journal article supplement (PMC6769427; doi:10.15252/embj.2019101688), 2019-09-02
Supplement: EMBJ-38-e101688-s001.pdf [file EMBJ-38-e101688-s001.pdf]

**Table of Content:**

**Appendix Table S1.** Primary antibodies.

**Appendix Table S2.** Secondary antibodies.

**Appendix Table S3.** List of RT-qPCR primers.

**Appendix Table S1.** Primary antibodies.

| <b>Antibody</b>     | <b>Reference</b>  | <b>Company</b>           |
|---------------------|-------------------|--------------------------|
| AE15                | Ab58755           | Abcam                    |
| BrdU                | AB6326            | Abcam                    |
| Cleaved caspase3    | 9661              | Cell signaling           |
| CD34                | 553731            | BD Biosciences           |
| Emilin1             | 103-M80           | ReliaTech                |
| GATA3               | SC-268            | Santa Cruz Biotechnology |
| JUP                 | CSB-PA12839A0Rb   | CUSABIO                  |
| K6                  | PRP-169P          | Covance                  |
| Ki67                | MAD-000310QD      | Master Diagnostica       |
| Lhx2/9              | Thomas Jessel lab | Columbia University      |
| LYVE1               | ab149117          | Abcam                    |
| P-cadherin          | 13-2000Z          | Invitrogen               |
| Smooth Muscle Actin | MS-113-P0         | ThermoFisher Scientific  |
| Tenascin C          | NB110-68136       | Novus Biologicals        |

**Appendix Table S2.** Secondary antibodies.

| <b>Antibody</b>             | <b>Reference</b> | <b>Company</b>         |
|-----------------------------|------------------|------------------------|
| Anti-Rabbit FITC            | 711-095-152      | Jackson immunoresearch |
| Anti-Rabbit Alexa Fluor 594 | 711-585-152      | Jackson immunoresearch |
| Anti-Rat Alexa Fluor 594    | 712-585-150      | Jackson immunoresearch |
| Anti-Mouse Alexa Fluor 488  | 715-545-151      | Jackson immunoresearch |

**Appendix Table S3.** List of RT-qPCR primers.

| <b>Primer</b> | <b>Sequence</b>       |
|---------------|-----------------------|
| ACTIN RW      | GTGGTGGTGAAGCTGTAGCC  |
| ACTIN FW      | GGCACCACACCTTCTACAATG |
| WLS FW        | ATGACCTCCAATGGTGGCTG  |
| WLS RW        | CCCCTATTGGCCCAAACCAT  |
