# Supplementary material for: Lymphatic vessels interact dynamically with the hair follicle stem cell niche during skin regeneration in vivo
Source: PubMed Central journal article supplement (PMC6769427; doi:10.15252/embj.2019101688), 2019-09-02
Supplement: EMBJ-38-e101688-s002.pdf [file EMBJ-38-e101688-s002.pdf]

## Expanded View Figures

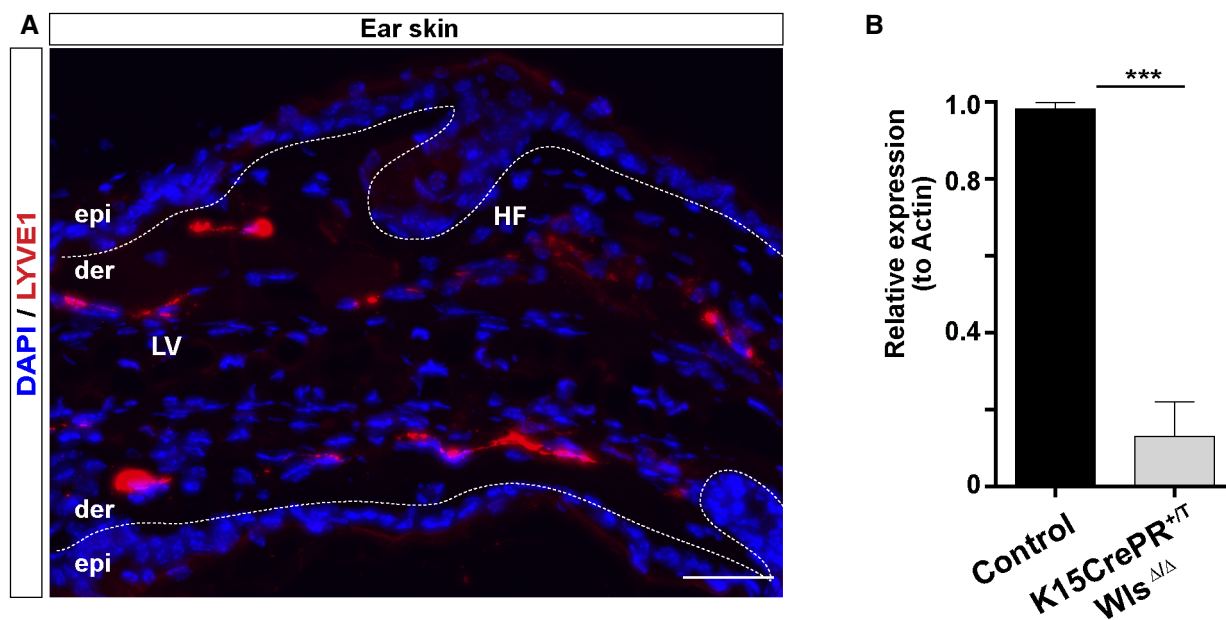

**Figure EV1.** Distribution of LV in the ear skin and validation of the reductions of Wls expression in the K15CrePR<sup>+/T</sup>; Wls<sup>Δ/Δ</sup> mouse model.

A Adult ear skin sections immunostained for LYVE1 (red) and counterstained with DAPI (blue). Scale bar, 50  $\mu$ m. LV, lymphatic vessels; HF, hair follicles; epi, epidermis; der, dermis.

B Histogram of the RT-qPCR analyses of the relative expression of Wls in the HFSC isolated from the K15CrePR<sup>+/T</sup>; Wls<sup>Δ/Δ</sup> mouse model and controls.  $n = 3-4$  skin samples per mouse,  $n = 3-4$  mice. Data represent the mean value  $\pm$  SEM. \*\*\* $P < 0.001$  (Mann-Whitney  $U$ -test).

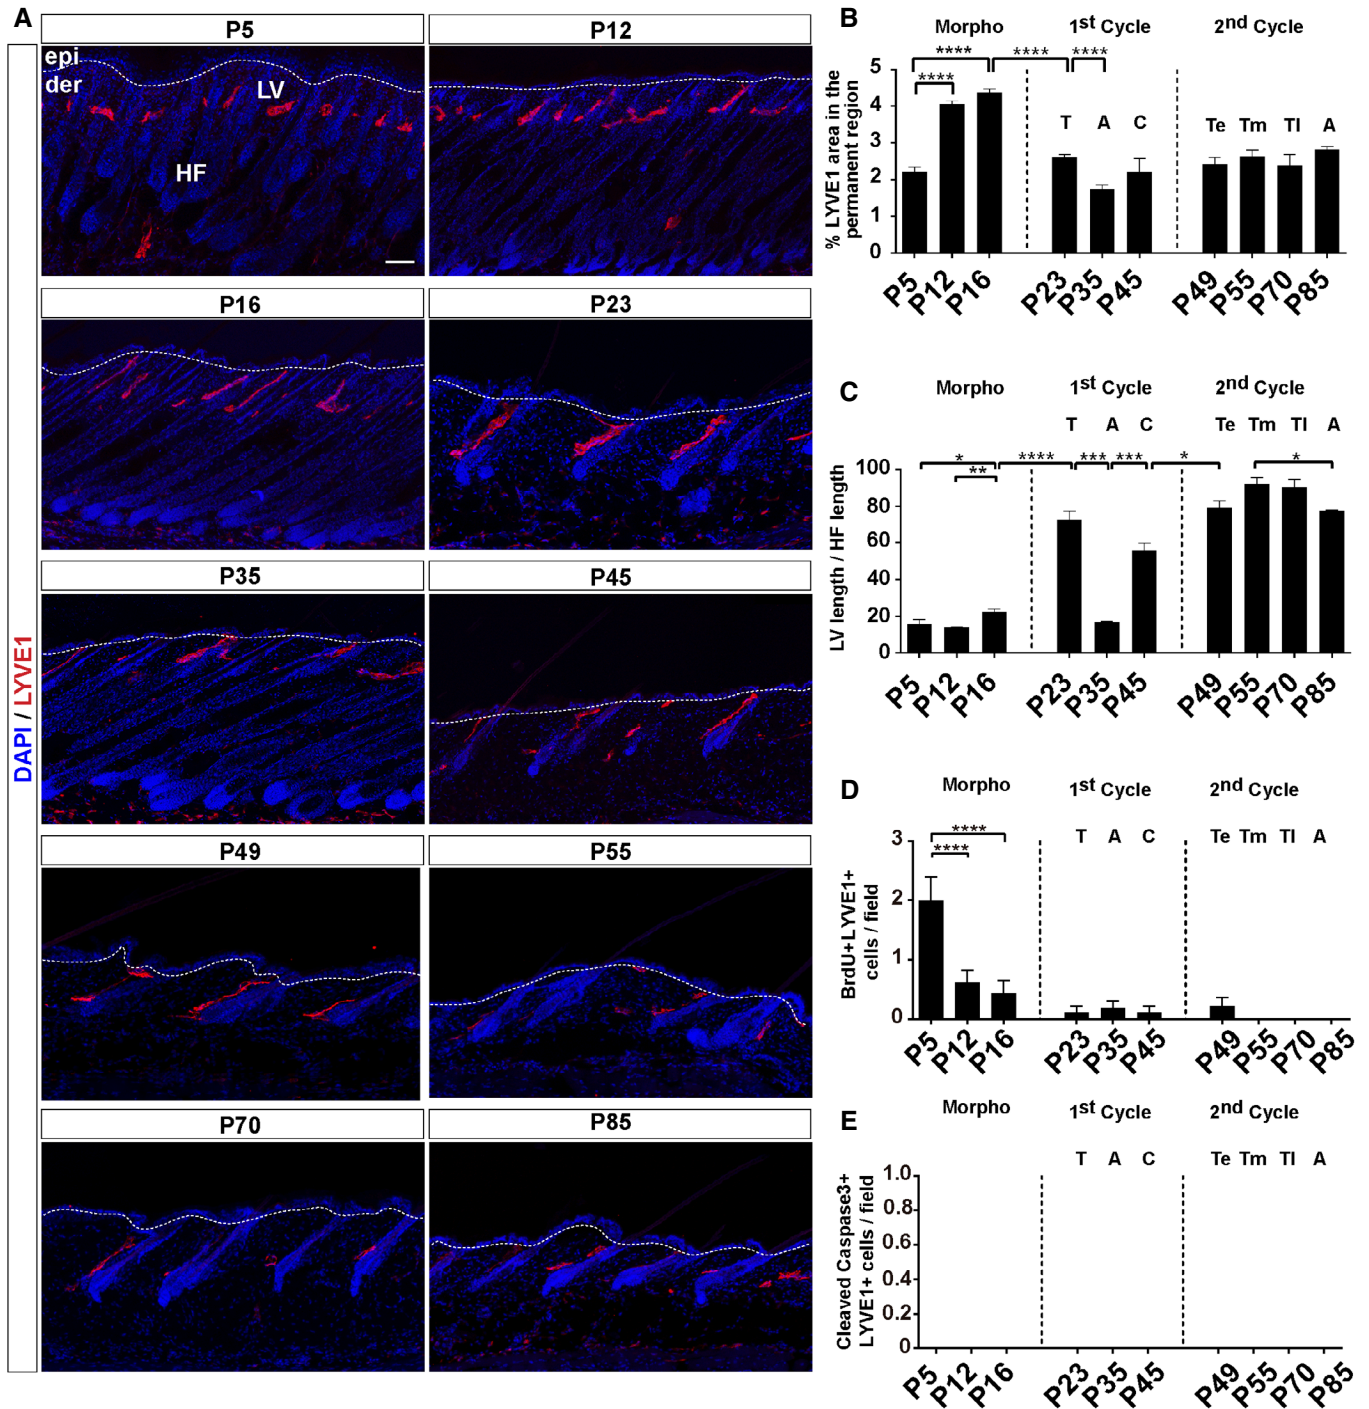

**Figure EV2. LV association with HF during the postnatal HF cycle.**

A Adult back skin sections from different postnatal (P) days immunostained for LYVE1 (red) and counterstained with DAPI (blue).  $n = 3-4$  skin samples per mouse,  $n = 3-4$  mice. Scale bar, 50  $\mu\text{m}$ . epi, epidermis; der, dermis; LV, lymphatic vessels; HF, hair follicle.

B Histogram of the percentage of LYVE1-positive area in the HF permanent region at different postnatal days.

C Histogram of the percentage of LV length relative to the HF length in the back skin at different postnatal days.

D Histogram of the number of BrdU<sup>+</sup> LYVE1<sup>+</sup> cells/field in the back skin at different postnatal days.

E Histogram of the number of cleaved caspase-3<sup>+</sup> LYVE1<sup>+</sup> cells/field in the back skin at different postnatal days.

Data information: The data shown in all histograms represent the mean value  $\pm$  SEM.  $n = 3-4$  skin samples per mouse,  $n = 3-4$  mice. \* $P < 0.05$ ; \*\* $P < 0.01$ ; \*\*\* $P < 0.001$ ; \*\*\*\* $P < 0.0001$ . (one-way ANOVA, Tukey's test). A, Anagen; C, Catagen; T, Telogen; Te, early Telogen; Tm, mid-Telogen; TI, late Telogen.

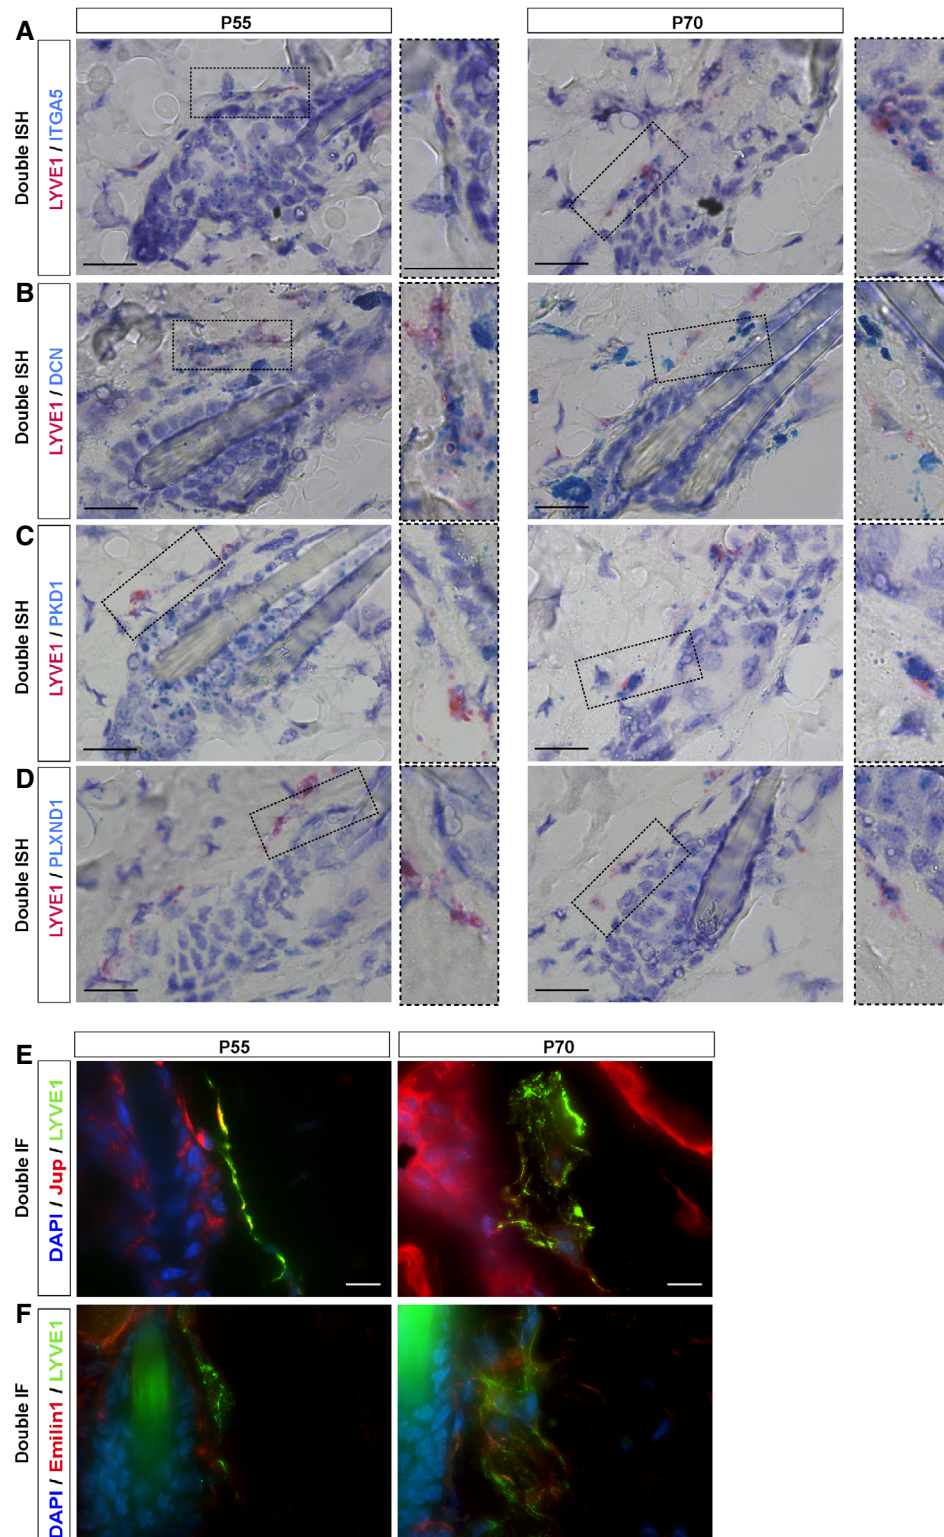

**Figure EV3. Validation of RNA-seq data by double *in situ* hybridization (ISH) and immunofluorescence intensity.**

A–D Representative images of RNA ISH analyses by RNAscope for *ITGAS* (A), *DCN* (B), *PKD1* (C), and *PLXND1* (D) (blue), showing the number of mRNA spots present in *LYVE1*<sup>+</sup> cells (red) in the vicinity of HF in P55 and P70 mouse back skin. Scale bar, 20  $\mu$ m, insets are shown to the right as higher magnifications.

E, F Representatives images of fluorescence analyses for *Jup* (E) and *Emilin1* (F) (red) in *LYVE1*<sup>+</sup> cells (green), and counterstained with DAPI (blue), in the vicinity of HF in P55 and P70 mouse skin. Scale bar, 10  $\mu$ m.

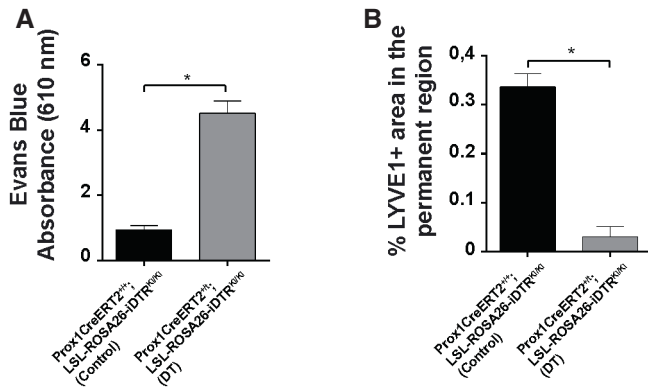

**Figure EV4.** Characterization of the efficiency of LV depletion in the back skin of Prox1CreERT2<sup>+/+</sup>; LSL-ROSA26-iDTR<sup>lox/lox</sup> mice upon treatment with diphtheria toxin.

**A** Histogram of the concentration of Evans Blue (absorbance 610 nm) in the skin of Prox1CreERT2<sup>+/+</sup>; LSL-ROSA26-iDTR<sup>lox/lox</sup> mice (Control) and Prox1CreERT2<sup>+/+</sup>; LSL-ROSA26-iDTR<sup>lox/lox</sup> mice treated intradermally with DT.  $n = 3-4$  skin samples per mouse,  $n = 3-4$  mice. Data represent the mean value  $\pm$  SEM. \* $P < 0.05$  (unpaired Student's  $t$ -test).

**B** Histogram of the percentage of LYVE1<sup>+</sup> area in the HF permanent region in skin sections from Prox1CreERT2<sup>+/+</sup>; LSL-ROSA26-iDTR<sup>lox/lox</sup> mice (Control) and Prox1CreERT2<sup>+/+</sup>; LSL-ROSA26-iDTR<sup>lox/lox</sup> mice treated intradermally with DT.  $n = 3-4$  skin samples per mouse,  $n = 3-4$  mice. Data represent the mean value  $\pm$  SEM. \* $P < 0.05$  (unpaired Student's  $t$ -test).

**Figure EV5.** LV depletion during the physiological HF Telogen does not induce changes in HF organization or growth, while in Anagen induces HF collapse and the loss of HF differentiation markers.

**A, B** Immunofluorescence of LYVE1 (green) (A) and histogram of the percentage of the LYVE1<sup>+</sup> area in the permanent region (B) in adult back skin sections from Prox1CreERT2<sup>+/+</sup>; LSL-ROSA26-iDTR<sup>lox/lox</sup> mice injected with vehicle (Control) and Prox1CreERT2<sup>+/+</sup>; LSL-ROSA26-iDTR<sup>lox/lox</sup> mice treated with tamoxifen and intradermal DT, starting from Anagen (P49) and analyzed at the end of the treatments (P55). Scale bar, 10  $\mu$ m.  $n = 3-4$  skin samples per mouse,  $n = 3-4$  mice. Data represent the mean value  $\pm$  SEM. \* $P < 0.05$  (unpaired Student's  $t$ -test).

**C-F** Immunofluorescence of LYVE1 (red) (C); Gata3 (green) & K6 (red) (D); AE15 (green) & K6 (red) (E); and P-cadherin (green) & K6 (red) (F) in adult back skin sections from Prox1CreERT2<sup>+/+</sup>; LSL-ROSA26-iDTR<sup>KI/KI</sup> mice injected with vehicle (Control), and Prox1CreERT2<sup>+/+</sup>; LSL-ROSA26-iDTR<sup>KI/KI</sup> mice treated with tamoxifen and intradermal DT, starting from Anagen (P30) and analyzed at the end of the treatments (P37). Scale bar, 50  $\mu$ m.  $n = 3-4$  skin samples per mouse,  $n = 3-4$  mice.

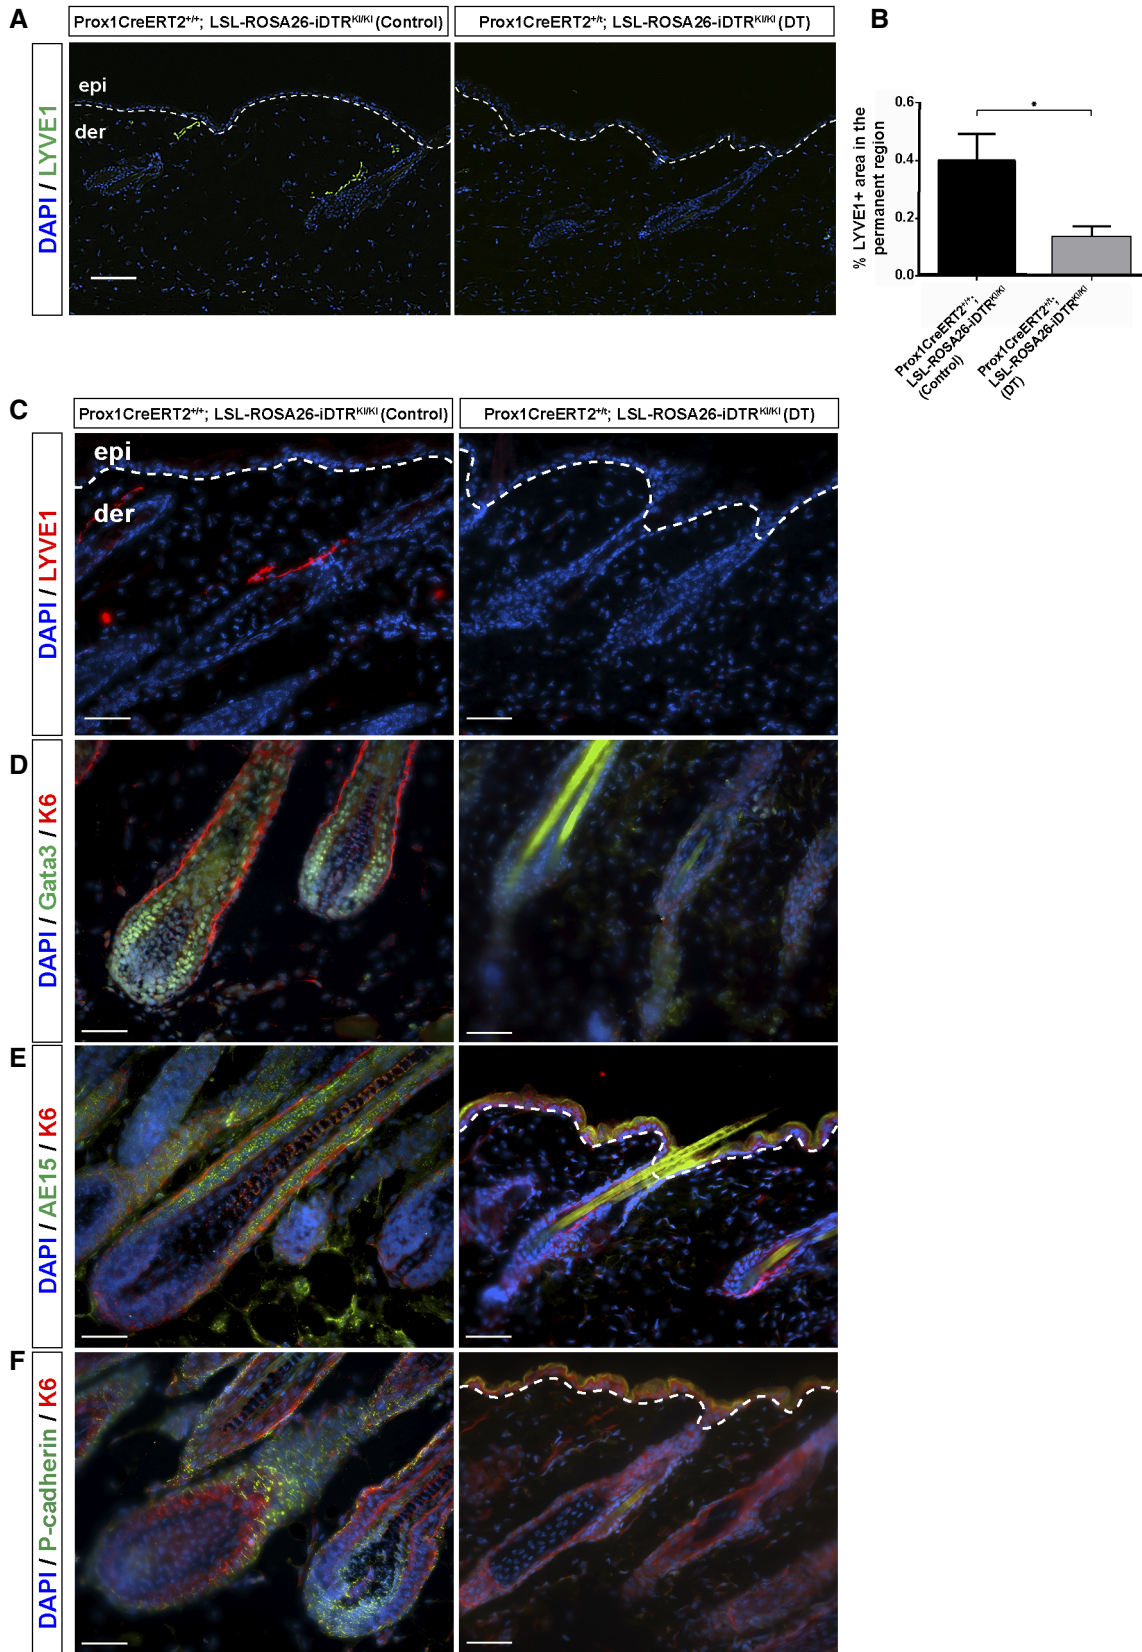

Figure EV5.
